# Supplementary material for: Promoting the electrocatalytic activity through the introduction of oxygen vacancies to core–shell NiO hollow sphere catalysts for efficient oxygen evolution
Source: Royal Society of Chemistry journal article supplement (doi:10.1039/d3nj03244b), 2023-01-01
Supplement: d3nj03244b1.pdf [file d3nj03244b1.pdf]

## **Electronic Supplementary Information**

**Promoting the electrocatalytic activity through introduction of oxygen vacancies to core-shelled NiO hollow spheres catalysts for efficient oxygen evolution**

**Long Li, Mengcong Jiao, Ben Xu, Shengrong Guo\* and Qiang Hu\***

Department of Chemistry, Lishui University, Lishui 323000, P. R. China.

E-mail: guosr9609@lsu.edu.cn, qihu@z-etech.cn

## 1 Chemicals and reagents

Cobalt nitrate hexahydrate ( $\text{Ni}(\text{NO}_3)_2 \cdot 6\text{H}_2\text{O}$ ), potassium hydroxide (KOH), isopropanol, glycerol, ethanol and Nafion were procured from Sigma-Aldrich. All the chemicals were of analytical grade and used without any further modification. Deionized water (DI) was obtained from Thermo Scientific Barnstead Pacific TII Water Purification System (18 M $\Omega$  cm).

## 2 Materials characterizations

The phase formation was identified using powder X-ray diffraction (XRD) (Bruker D8, Cu-K $\alpha$ ). The morphologies of the catalysts were observed by field emission scanning electron microscopy (FE-SEM, HITACHI S-4800) and transmission electron microscopy (TEM, JEOL JEM-2010). The linear scanning energy-dispersive X-ray spectrometry (EDX) and EDX elemental mappings were taken on TEM. The X-ray photoelectron spectroscopy (XPS) spectra were measured on ESCALAB 250 spectrometer (Perkin-Elmer). Raman spectra were analyzed using in-Via Raman spectrometer.

## 3 Electrochemical measurements

The electrochemical tests were conducted on CHI 760E electrochemical workstation. The Ag/AgCl (saturated KCl solution) as used as the reference electrode, a graphite rod was served as the counter electrode, and all NiO spheres catalysts were utilized as working electrode. All electrochemical tests were performed in 1 M KOH aqueous electrolyte and the catalysts were dissolved in ethanol solution and then uniformly cast onto glassy carbon working electrode with a total loading of 0.4 mg cm<sup>-2</sup>. All the linear sweep voltammetry (LSV) measurements were taken at a scan rate of 5 mV s<sup>-1</sup> to obtain the polarization curves. Chronoamperometric measurements were performed at corresponding potential to deliver a current density of 10 mA cm<sup>-2</sup>. The Tafel slope was calculated according to the Tafel equation  $\eta = b \log(j/j_0)$  ( $\eta$  is the overpotential,  $b$  is the Tafel slope,  $j$  is the current density, and  $j_0$  is the exchange current density). Potentials were referenced to a reversible hydrogen electrode (RHE)

using the following equation: Potentials were referenced to a reversible hydrogen electrode (RHE) using the following equation:  $E(\text{RHE}) = E(\text{Ag/AgCl}) + (0.205 + 0.059\text{pH}) \text{ V}$ . The double layer capacitance ( $C_{\text{dl}}$ ) was obtained using cyclic voltammetry (CV) scanning from 1.22 to 1.28 V vs. RHE with different scan rates from 20 to 60  $\text{mV s}^{-1}$  for OER. The electrochemical impedance spectroscopy (EIS) measurements were carried out by ranging the frequency from 100 k Hz to 0.1 Hz.

#### 4. Supplementary figures

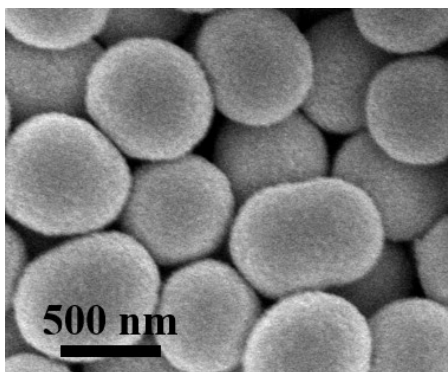

**Fig. S1** SEM image of the Ni-precursor sample.

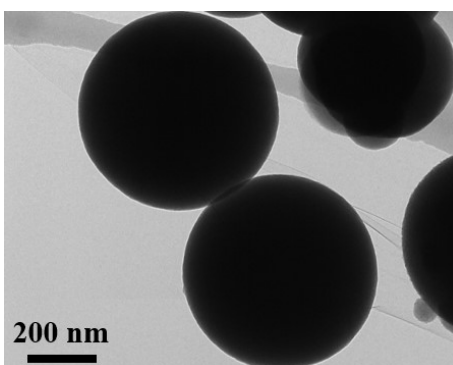

**Fig. S2** TEM image of the Ni-precursor sample.

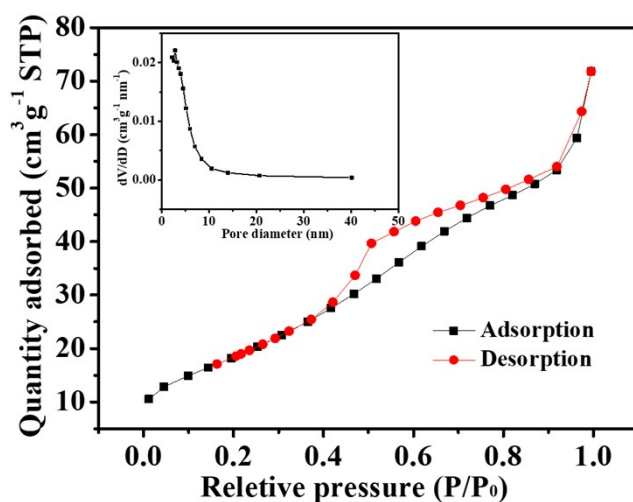

**Fig. S3** N<sub>2</sub> adsorption-desorption isotherm, and the corresponding pore size distribution (inset) of the core-shell NiO<sub>1-x</sub>-M hollow spheres.

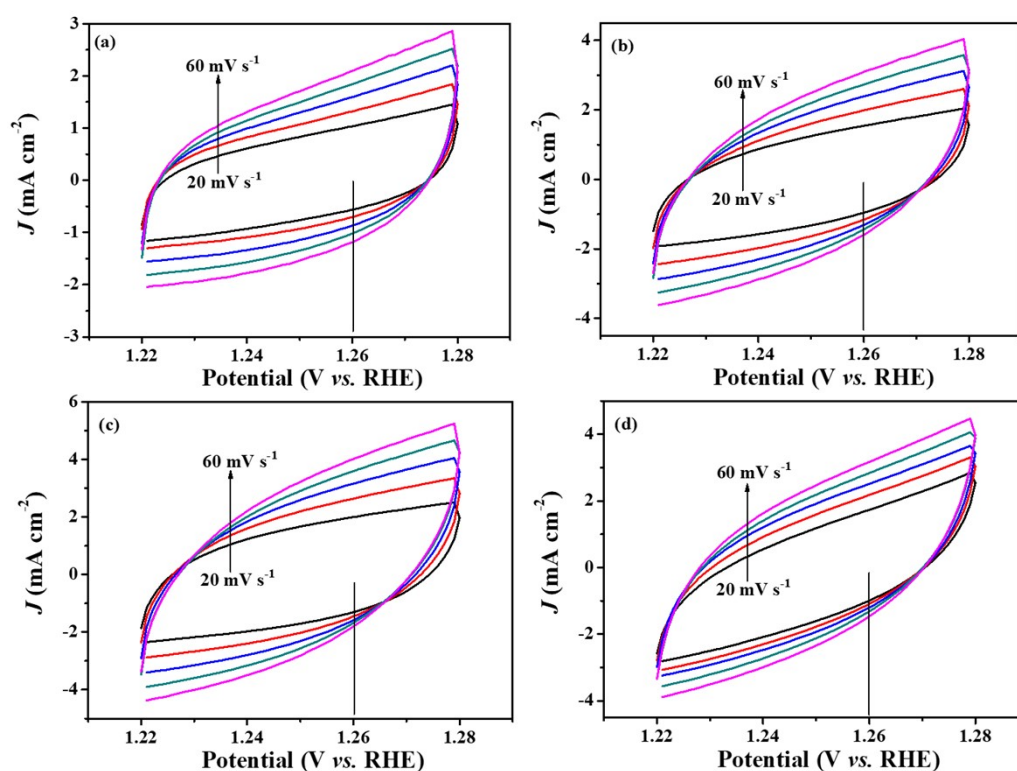

**Fig. S4** CVs tested at the potential range of 1.22 –1.28 V vs. RHE with the scan rates increasing from 20 to 60 mV s<sup>-1</sup> for (a) NiO, (b) NiO<sub>1-x</sub>-L, (c) NiO<sub>1-x</sub>-M and (d) NiO<sub>1-x</sub>-H spheres.

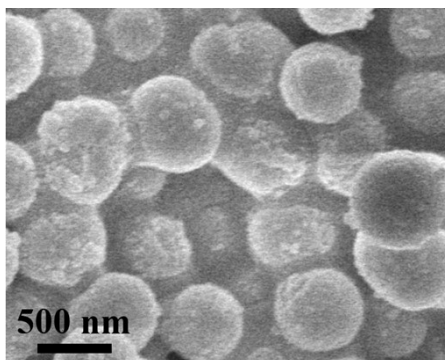

Fig. S5 SEM image of of the NiO<sub>1-x</sub>-M catalyst after the cycling test.

**Table S1** Comparison of OER performance in alkaline media for NiO<sub>1-x</sub>-M spheres with other reported OER catalysts electrocatalysts.

| Catalysts                                    | Current density<br>(j, mA cm <sup>-2</sup> ) | $\eta$ at the<br>corresponding j<br>(mV) | Tafel slope<br>(mV dec <sup>-1</sup> ) | Ref.         |
|----------------------------------------------|----------------------------------------------|------------------------------------------|----------------------------------------|--------------|
| NiO <sub>1-x</sub> -M spheres                | 10                                           | 360                                      | 103.9                                  | this<br>work |
| Fe-doped NiO                                 | 10                                           | 310                                      | N.A. <sup>a</sup>                      | 1            |
| NiO-V <sub>o</sub> nanosheet                 | 10                                           | 138                                      | 138                                    | 2            |
| Sm-NiO-E                                     | 10                                           | 409                                      | 81                                     | 3            |
| porous NiO                                   | 10                                           | 310 <sup>b</sup>                         | 54                                     | 4            |
| O-NiO@MCSN                                   | 10                                           | 410                                      | 93                                     | 5            |
| NiO nanosheets                               | 10                                           | 400                                      | 136                                    | 6            |
| NiO NPs/g-C <sub>3</sub> N <sub>4</sub>      | 10                                           | 360                                      | 65                                     | 7            |
| NiO/NiS                                      | 40                                           | 209 <sup>c</sup>                         | 60                                     | 8            |
| Ni/NiO                                       | 10                                           | 470                                      | 58                                     | 9            |
| NiO nanobelts                                | 50                                           | 382                                      | 142                                    | 10           |
| Se-Fe <sub>2</sub> O <sub>3</sub> @Ni/NiO/CC | 10                                           | 205 <sup>c</sup>                         | 36                                     | 11           |
| Ce-NiO-E                                     | 10                                           | 382                                      | 118                                    | 12           |
| NiO/CuO nanosheet                            | 10                                           | 234 <sup>b</sup>                         | 22                                     | 13           |
| Co doped NiO                                 | 10                                           | 370                                      | 69                                     | 14           |
| NiO nanosheets                               | 10                                           | 380                                      | 299                                    | 15           |
| NiO/CoFe alloy<br>nanosheets                 | 30                                           | 280 <sup>c</sup>                         | 77                                     | 16           |

a: not given

b: tested on nickel foam

c: tested on carbon cloth

## References

1. A. C. Pebley, E. Decolvenaere, T. M. Pollock and M. J. Gordon, *Nanoscale*, 2017, **9**, 15070-15082.
2. Z. Dong, J. Wu and X. Guo, *Electrocatalysis*, 2022, **13**, 818-829.
3. S. Aman, N. Ahmad, M. B. Tahir, M. M. Alanazi, S. A. M. Abdelmohsen, R. Y. Khosa and H. M. T. Farid, *Surfaces and Interfaces*, 2023, **38**, 102857.
4. P. T. Babar, A. C. Lokhande, M. G. Gang, B. S. Pawar, S. M. Pawar and J. H. Kim, *Journal of Industrial and Engineering Chemistry*, 2018, **60**, 493-497.
5. D. Xu, Q. Huang, X. Xu and X. Sang, *Dalton Transactions*, 2020, **49**, 12441-12449.
6. B. Xia, T. Wang, X. Jiang, J. Li, T. Zhang, P. Xi, D. Gao and D. Xue, *Journal of Materials Chemistry A*, 2019, **7**, 4729-4733.
7. K. Bhunia, S. Khilari, M. Chandra, D. Pradhan and S. J. Kim, *Journal of Alloys and Compounds*, 2023, **935**, 167842.
8. N. A. Khan, N. Rashid, M. Junaid, M. N. Zafar, M. Faheem and I. Ahmad, *ACS Applied Energy Materials*, 2019, **2**, 3587-3594.
9. M. K. Paliwal and S. K. Meher, *New Journal of Chemistry*, 2020, **44**, 17507-17517.
10. J. Wang, J. Xu, Q. Wang, Z. Liu, X. Zhang, J. Zhang, S. Lei, Y. Li, J. Mu and E. C. Yang, *Physical Chemistry Chemical Physics*, 2022, **24**, 6087-6092.
11. S. A. Shah, G. Zhu, A. Yuan, N. Ullah, X. Shen, H. Khan, K. Xu, X. Wang and X. Yan, *Dalton Transactions*, 2020, **49**, 15682-15692.
12. W. Gao, Z. Xia, F. Cao, J. C. Ho, Z. Jiang and Y. Qu, *Advanced Functional Materials*, 2018, **28**, 1706056.
13. H. J. Yin, K. Yuan, Y. L. Zheng, X. C. Sun and Y. W. Zhang, *The Journal of Physical Chemistry C*, 2021, **125**, 16516-16523.
14. A. Vazhayil, S. Ashok C, J. Thomas and N. Thomas, *Materials Chemistry and Physics*, 2023, **300**, 127540.
15. R. K. Mishra, V. Kumar, G. J. Choi, J. W. Ryu, S. M. Mane, J. C. Shin and J. S. Gwag, *Materials Letters*, 2022, **324**, 132740.
16. Y. Lei, L. Zhang, D. Zhou, C. Xiong, Y. Zhao, W. Chen, X. Xiang, H. Shang and B. Zhang, *Renewable Energy*, 2022, **194**, 459-468.
